# Supplementary material for: Antisense oligonuclotides with oxetane-constrained cytidine enhance heteroduplex stability, and elicit satisfactory RNase H response as well as showing improved resistance to both exo and endonucleasesElectronic supplementary information (ESI) available: RNA cleavage kinetics. See http://www.rsc.org/suppdata/ob/b2/b210163g/
Source: Royal Society of Chemistry journal article supplement (doi:10.1039/b210163g), 2002-11-26
Supplement: b210163g-s3.pdf [file b210163g-s3.pdf]

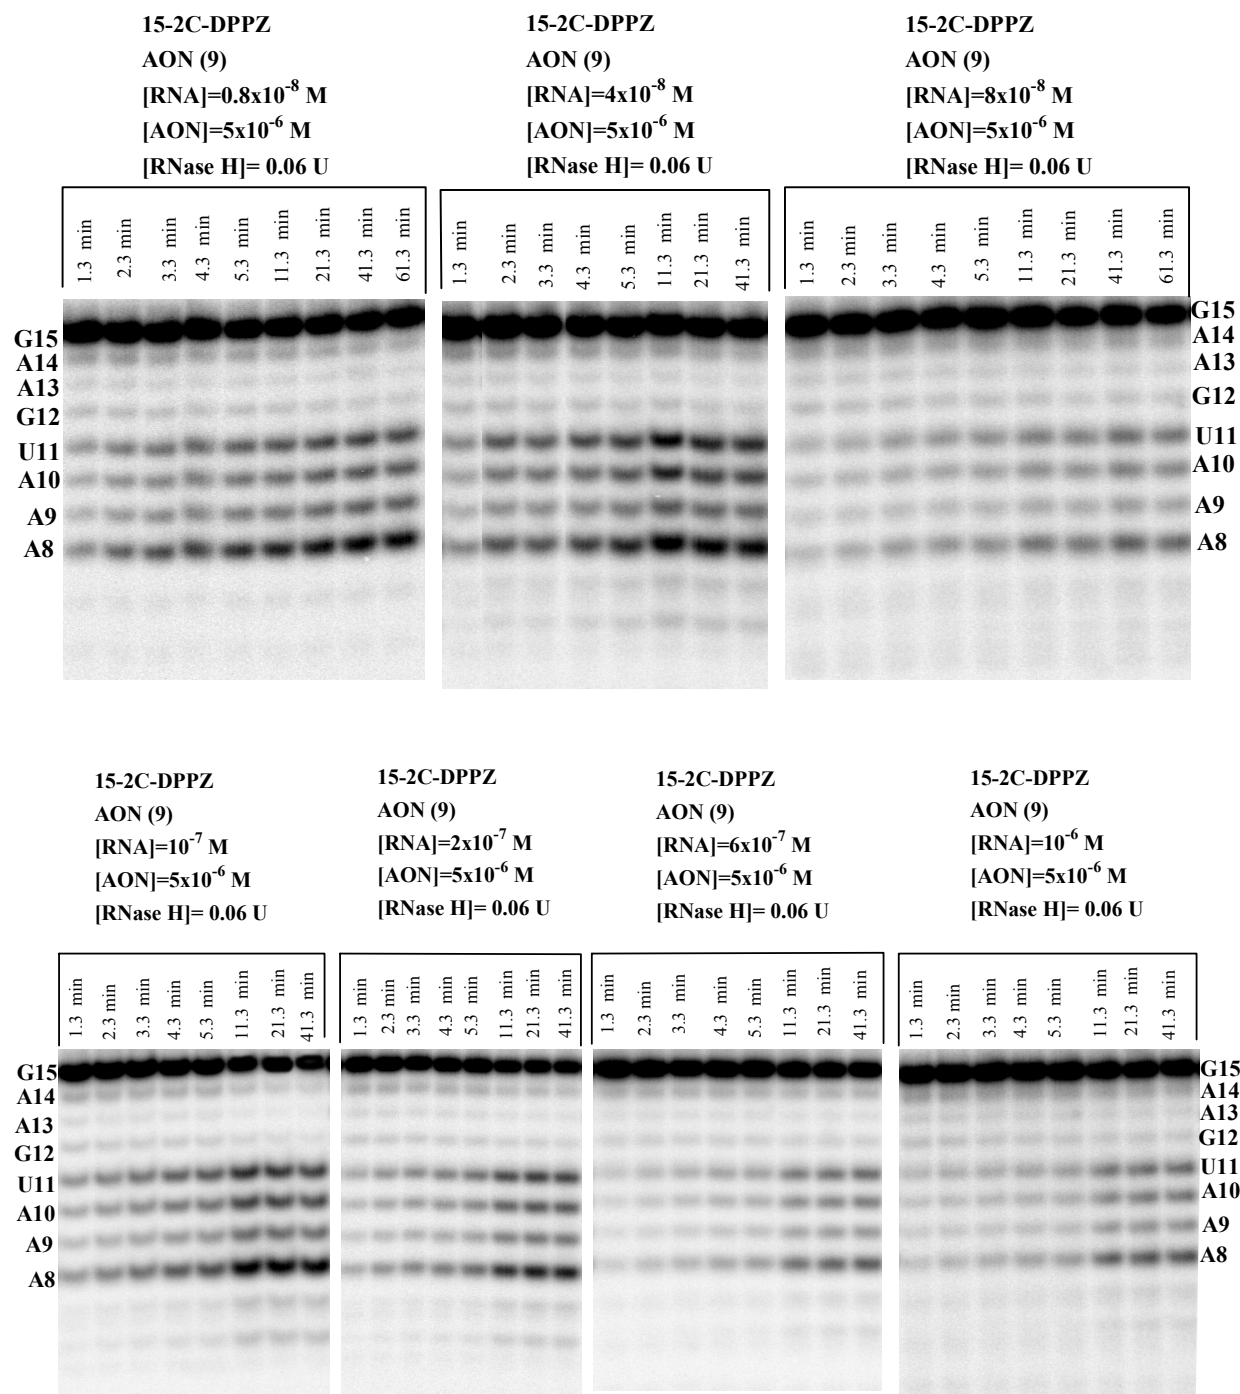

**Figure S3.** Autoradiograms of 20% denaturing PAGE, showing the cleavage kinetics of 5'-<sup>32</sup>P labeled target RNA (**14**) by RNase H1 in the oxetane **C** modified AON (**9**)/RNA (**14**) hybrid duplex. Conditions of cleavage reaction: RNA (0.008 μM – 1 μM) and AONs (5 μM) in buffer, containing 20 mM Tris-HCl (pH 8.0), 20 mM KCl, 10 mM Mg Cl<sub>2</sub> and 0.1 mM DTT at 21 C, 0.06 U of RNase H. Total reaction volume is 30 μl. (See Materials and Methods section for full experimental details.)
